# Supplementary material for: Design amphiphilic dipolar π-systems for stimuli-responsive luminescent materials using metastable states
Source: Springer Nature journal article supplement (doi:10.1038/ncomms5013), 2014-06-05
Supplement: 41467_2014_BFncomms5013_MOESM3_ESM.mol [file 41467_2014_BFncomms5013_MOESM3_ESM.mol]

  ChemDraw05191405302D

 39 41  0  0  0  0  0  0  0  0999 V2000
   -2.8945    0.7181    0.0000 C   0  0  0  0  0  0  0  0  0  0  0  0
   -2.0667    0.7181    0.0000 C   0  0  0  0  0  0  0  0  0  0  0  0
   -1.6528    0.0012    0.0000 C   0  0  0  0  0  0  0  0  0  0  0  0
   -2.0667   -0.7157    0.0000 C   0  0  0  0  0  0  0  0  0  0  0  0
   -2.8945   -0.7157    0.0000 C   0  0  0  0  0  0  0  0  0  0  0  0
   -3.3084    0.0012    0.0000 C   0  0  0  0  0  0  0  0  0  0  0  0
   -0.8278    0.0012    0.0000 C   0  0  0  0  0  0  0  0  0  0  0  0
   -0.4153   -0.7133    0.0000 C   0  0  0  0  0  0  0  0  0  0  0  0
    0.4097   -0.7133    0.0000 C   0  0  0  0  0  0  0  0  0  0  0  0
    0.8236    0.0036    0.0000 C   0  0  0  0  0  0  0  0  0  0  0  0
    1.6514    0.0036    0.0000 C   0  0  0  0  0  0  0  0  0  0  0  0
    2.0653   -0.7133    0.0000 C   0  0  0  0  0  0  0  0  0  0  0  0
    1.6514   -1.4301    0.0000 C   0  0  0  0  0  0  0  0  0  0  0  0
    0.8236   -1.4301    0.0000 C   0  0  0  0  0  0  0  0  0  0  0  0
    2.8903   -0.7133    0.0000 C   0  0  0  0  0  0  0  0  0  0  0  0
    3.3028   -1.4277    0.0000 C   0  0  0  0  0  0  0  0  0  0  0  0
    4.1278   -1.4277    0.0000 C   0  0  0  0  0  0  0  0  0  0  0  0
    4.5417   -0.7109    0.0000 C   0  0  0  0  0  0  0  0  0  0  0  0
    5.3695   -0.7109    0.0000 C   0  0  0  0  0  0  0  0  0  0  0  0
    5.7833   -1.4277    0.0000 C   0  0  0  0  0  0  0  0  0  0  0  0
    5.3695   -2.1446    0.0000 C   0  0  0  0  0  0  0  0  0  0  0  0
    4.5417   -2.1446    0.0000 C   0  0  0  0  0  0  0  0  0  0  0  0
    6.6083   -1.4277    0.0000 C   0  0  0  0  0  0  0  0  0  0  0  0
   -4.1334    0.0012    0.0000 N   0  0  0  0  0  0  0  0  0  0  0  0
   -4.5459   -0.7133    0.0000 C   0  0  0  0  0  0  0  0  0  0  0  0
   -4.5459    0.7157    0.0000 C   0  0  0  0  0  0  0  0  0  0  0  0
   -5.3709   -0.7133    0.0000 C   0  0  0  0  0  0  0  0  0  0  0  0
   -5.7834   -1.4277    0.0000 C   0  0  0  0  0  0  0  0  0  0  0  0
   -6.6084   -1.4277    0.0000 C   0  0  0  0  0  0  0  0  0  0  0  0
   -7.0208   -2.1422    0.0000 C   0  0  0  0  0  0  0  0  0  0  0  0
   -7.8458   -2.1422    0.0000 C   0  0  0  0  0  0  0  0  0  0  0  0
   -5.3709    0.7157    0.0000 C   0  0  0  0  0  0  0  0  0  0  0  0
   -5.7834    1.4301    0.0000 C   0  0  0  0  0  0  0  0  0  0  0  0
   -6.6084    1.4301    0.0000 C   0  0  0  0  0  0  0  0  0  0  0  0
   -7.0208    2.1446    0.0000 C   0  0  0  0  0  0  0  0  0  0  0  0
   -7.8458    2.1446    0.0000 C   0  0  0  0  0  0  0  0  0  0  0  0
    7.0208   -2.1422    0.0000 O   0  0  0  0  0  0  0  0  0  0  0  0
    7.0208   -0.7133    0.0000 O   0  0  0  0  0  0  0  0  0  0  0  0
    7.8458   -0.7133    0.0000 C   0  0  0  0  0  0  0  0  0  0  0  0
  1  2  2  0      
  2  3  1  0      
  3  4  2  0      
  4  5  1  0      
  5  6  2  0      
  6  1  1  0      
  3  7  1  0      
  7  8  2  0      
  8  9  1  0      
  9 10  2  0      
 10 11  1  0      
 11 12  2  0      
 12 13  1  0      
 13 14  2  0      
 14  9  1  0      
 12 15  1  0      
 15 16  2  0      
 16 17  1  0      
 17 18  2  0      
 18 19  1  0      
 19 20  2  0      
 20 21  1  0      
 21 22  2  0      
 22 17  1  0      
 20 23  1  0      
  6 24  1  0      
 23 38  1  0      
 24 25  1  0      
 24 26  1  0      
 25 27  1  0      
 27 28  1  0      
 28 29  1  0      
 29 30  1  0      
 30 31  1  0      
 26 32  1  0      
 32 33  1  0      
 33 34  1  0      
 34 35  1  0      
 35 36  1  0      
 23 37  2  0      
 38 39  1  0      
M  END
